# Supplementary material for: By-Product from Livestock Waste Recovery System Used as Fertilizer: Bioactive Compounds and Antioxidant Activity of Tomato Fruit as Affected by Fertilization under Field and Greenhouse Conditions
Source: MDPI journal article supplement (doi:10.3390/fermentation9080714), 2023-07-27
Supplement: s1 [file s1]

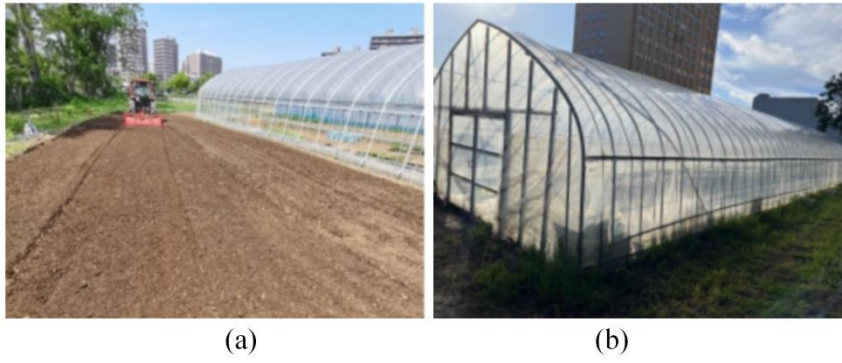

**Figure S1 Experimental sites at First Farm of Hokkaido University.**

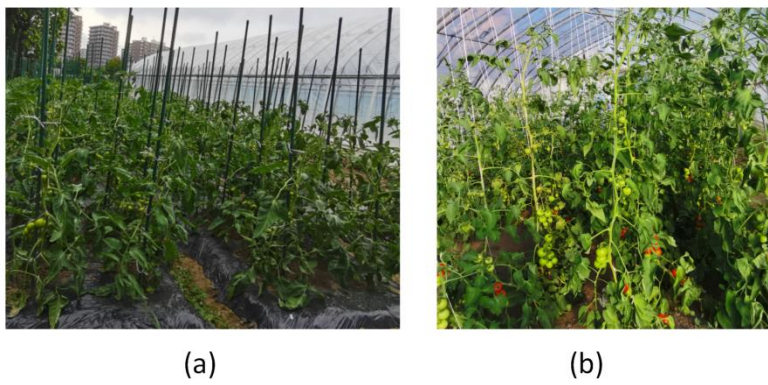

**Figure S2 Experimental sites used in the study. (a) Field; (b) Greenhouse.**

**Table S1 Climatic conditions of experimental sites during production season.**

|           | Air temperature (°C) |      | Precipitation (mm) |      |       |
|-----------|----------------------|------|--------------------|------|-------|
|           | Field                |      | Greenhouse         |      | Sum   |
|           | Max                  | Min  | Max                | Min  |       |
| June      | 30.6                 | 8.8  | 38.4               | 12.1 | 50.5  |
| July      | 34.3                 | 16.4 | 41.1               | 17.1 | 7.5   |
| August    | 34.4                 | 13.9 | 42.8               | 15.6 | 108.5 |
| September | 26.6                 | 11.1 | 37.6               | 12.8 | 73    |
| October   | 27.3                 | 7.3  | 36.6               | 9.5  | 150   |
| November  |                      |      | 29.5               | 8.6  |       |

**Table S2 Effect of fertilization on sugar to acid ratio (SAR) in the field and greenhouse.**

| Site       | CK         | NPK        | Digestate  | Compost    |
|------------|------------|------------|------------|------------|
| SAR        |            |            |            |            |
| Field      | 3.47±0.52b | 3.55±0.37b | 5.11±0.39a | 5.14±0.35a |
| Greenhouse | 4.81±0.07b | 4.91±0.19b | 6.33±0.26a | 6.19±0.05a |

The different lowercase letters indicate a significant difference between the samples of the same cultivation experiment ( $p < 0.05$ ).

**Table S3 Effect of fertilization on phenolic compounds in the field and greenhouse.**

| Site            | CK         | NPK         | Digestate   | Compost     | Treatment | F-value    |
|-----------------|------------|-------------|-------------|-------------|-----------|------------|
| Caffeic acid    |            |             |             |             | CE        | 1308.17*** |
| Field           | 0.13±0.01c | 0.20±0.01b  | 0.29±0.00a  | 0.28±0.01a  | FT        | 1564.69*** |
| Greenhouse      | 0.45±0.01c | 1.35±0.04b  | 2.22±0.03a  | 2.24±0.06a  | CE×FT     | 109.04**   |
| Catechin        |            |             |             |             | CE        | 96.67***   |
| Open field      | 8.15±0.85c | 9.76±0.31b  | 12.82±0.26a | 12.05±0.25a | FT        | 107.47***  |
| Greenhouse      | 9.84±0.37c | 12.33±0.54b | 14.73±0.54a | 14.62±0.33a | CE×FT     | 0.51ns     |
| q-Coumaric acid |            |             |             |             | CE        | 2389.01*** |
| Field           | 0.22±0.02c | 0.32±0.02b  | 0.66±0.03a  | 0.67±0.01a  | FT        | 174.75***  |
| Greenhouse      | 1.22±0.10c | 1.74±0.10b  | 2.45±0.12a  | 2.31±0.09a  | CE×FT     | 33.62***   |
| Ferulic acid    |            |             |             |             | CE        | 1897.33*** |
| Field           | 1.04±0.04b | 1.47±0.04a  | 1.45±0.06a  | 1.49±0.08a  | FT        | 29.41***   |
| Greenhouse      | 2.61±0.09b | 2.88±0.07a  | 2.94±0.08a  | 2.88±0.15a  | CE×FT     | 1.51ns     |
| Kaempferol      |            |             |             |             | CE        | 1253.79*** |
| Field           | 0.19±0.01c | 0.29±0.00b  | 0.35±0.01a  | 0.35±0.01a  | FT        | 284.42***  |
| Greenhouse      | 0.36±0.01c | 0.43±0.01b  | 0.55±0.01a  | 0.54±0.02a  | CE×FT     | 5.32*      |
| Naringenin      |            |             |             |             | CE        | 75.81***   |
| Field           | 0.05±0.01c | 0.15±0.02b  | 0.24±0.01a  | 0.24±0.01a  | FT        | 233.45***  |
| Greenhouse      | 0.15±0.01c | 0.17±0.01b  | 0.26±0.00a  | 0.27±0.01a  | CE×FT     | 13.97***   |

CE: cultivation environment; FT: fertilization treatment. The different lowercase letters indicate a significant difference between the samples of the same cultivation experiment ( $p < 0.05$ ). Student's t-test (\*\*\*  $p < 0.001$ , \*\*  $p < 0.01$ ; \*,  $p < 0.05$ , ns  $p > 0.05$ ).

**S-A1:**

Approximately 5 g of homogenate was accurately weighed, diluted to 20.0 mL with ultrapure water (Millipore, Bedford, MA, USA), and incubated for 20 min in a 35 °C water bath. After centrifugation of samples at 10,000 ×g for 10 min (MX-305, TOMY, Tokyo Rikakikai, Tokyo, Japan), the supernatant was removed and filtered through a 0.22-μm, 25-mm-diameter syringe filter (PTFE, Merck Millipore, Ireland). The filtered solution was then used for sugar and organic acid analyses.

**S-A2:**

Approximately 5 g of homogenate was accurately weighed and then diluted to 20.0 mL with 80% methanol solution. The samples were shaken for 5 h in a rotator (BioSan, Riga, Latvia), left at 4 °C overnight, and then subjected to ultrasonication for 10 min. After centrifugation of samples at 10,000 ×g for 10 min at 20 °C, the supernatant was filtered through a 0.22-μm, 25-mm-diameter syringe filter. The filtered solution was then used for analysis of phenolic compounds.
